# Supplementary material for: Electrochemical performance of activated carbon fiber with hydrogen bond-induced high sulfur/nitrogen doping
Source: Royal Society of Chemistry journal article supplement (doi:10.1039/d0ra06724e), 2020-01-01
Supplement: d0ra06724e1.pdf [file d0ra06724e1.pdf]

**Electrochemical performance of activated carbon fiber with hydrogen bond-induced high sulphur/nitrogen doping**

Chaohui Ruan, Yibing Xie\*

School of Chemistry and Chemical Engineering, Southeast University, Nanjing 211189, China

**Table S1** Elemental contents in S/N-CF, S/N-CF-O and S/N-ACF.

| Samples  | Surface element (at. %) |      |      |      | Surface content (at.%) of different N functionalities |      |      |      | Surface content (at.%) of different S functionalities |                |                |
|----------|-------------------------|------|------|------|-------------------------------------------------------|------|------|------|-------------------------------------------------------|----------------|----------------|
|          | C                       | O    | N    | S    | N-6                                                   | N-5  | N-Q  | N-O  | S <sub>1</sub>                                        | S <sub>2</sub> | S <sub>3</sub> |
| S/N-CF   | 98.14                   | —    | 1.25 | 0.61 | 0.54                                                  | 0.18 | 0.53 | —    | 0.38                                                  | 0.23           | —              |
| S/N-CF-O | 90.40                   | 7.37 | 1.45 | 0.78 | 0.43                                                  | 0.55 | 0.09 | 0.38 | 0.17                                                  | 0.46           | 0.15           |
| S/N-ACF  | 88.77                   | 3.71 | 4.36 | 3.16 | 1.26                                                  | 1.75 | 0.67 | 0.68 | 1.30                                                  | 1.28           | 0.58           |

Note: N-6 is pyridinic nitrogen; N-5 is pyrrolic nitrogen; N-Q is graphitic nitrogen; S<sub>1</sub> is thiophene-S<sub>2</sub>p<sub>3/2</sub>; S<sub>2</sub> is thiophene-S<sub>2</sub>p<sub>1/2</sub>; S<sub>3</sub> is the sulfur oxide.

**Table S2** Comparison of nitrogen and sulfur content of recently reported carbons with S/N co-doping.

| Samples                         | methods                                                                                       | N (At. %)   | S (At. %)   | Ref.         |
|---------------------------------|-----------------------------------------------------------------------------------------------|-------------|-------------|--------------|
| N/S Co-Doped Graphene Hydrogel  | Graphene, (NH <sub>4</sub> ) <sub>2</sub> SO <sub>4</sub> and melamine at 600 °C              | 2.86        | 0.07        | <sup>1</sup> |
| N/S Self-Doped Activated Carbon | Pretreated elm flowers at 700 °C for 1h                                                       | 2.61        | 0.8         | <sup>2</sup> |
| N/S Co-Doped Graphene Hydrogel  | Hydrothermal treatment of TU and GO                                                           | 2.5         | 1.2         | <sup>3</sup> |
| Porous Carbon                   | Glucose, NaHCO <sub>3</sub> and TU at 700 °C for 2h                                           | 3.42        | 0.2         | <sup>4</sup> |
| S-RGO                           | H <sub>2</sub> SO <sub>4</sub> , H <sub>2</sub> O <sub>2</sub> and graphite at 1000 °C for 2h | -           | 1.47        | <sup>5</sup> |
| CFC-750-N-S                     | LiNO <sub>3</sub> , Na <sub>2</sub> S <sub>2</sub> O <sub>3</sub> and CFC at 1000 °C for 2h   | 2.72        | 1.84        | <sup>6</sup> |
| N/S co-doped carbon nanosheets  | C15 powders and TU at 800 °C for 3h                                                           | 1.7         | 2.6         | <sup>7</sup> |
| S/N-ACF                         | TU and CF-OH at 1000 °C for 2h                                                                | <b>4.36</b> | <b>3.16</b> | This work    |

**Table S3** Summary of calculated results: the binding energy ( $E_b$ ), the distance of TU to C<sub>32</sub> or hydrogen bond (d).

| Configurations         | Binding site | $E_b$ (eV) | d (Å) |
|------------------------|--------------|------------|-------|
| TU/C <sub>32</sub>     | N            | 0.73       | 3.08  |
| TU/C <sub>32</sub> -O  | H            | 0.79       | 1.78  |
| TU/C <sub>32</sub> -OH | H            | 1.46       | 1.86  |
|                        | S            |            | 1.40  |

**Table S4** Fitting values of the equivalent circuit elements for S/N-CF, S/N-CF-O and S/N-ACF.

| Samples  | $R_o$ ( $\Omega$ ) | $R_{ct}$ ( $\Omega$ ) | CPE     |         |       | $W_o$ |       |
|----------|--------------------|-----------------------|---------|---------|-------|-------|-------|
|          |                    |                       | $CPE_T$ | $CPE_P$ | $W_R$ | $W_T$ | $W_P$ |
| S/N-CF   | 2.36               | 0.82                  | 0.33    | 0.83    | 2.97  | 2.01  | 0.48  |
| S/N-CF-O | 4.15               | 4.83                  | 0.35    | 0.81    | 1.94  | 1.32  | 0.47  |
| S/N-ACF  | 1.36               | 0.72                  | 0.51    | 0.97    | 1.35  | 1.20  | 0.49  |

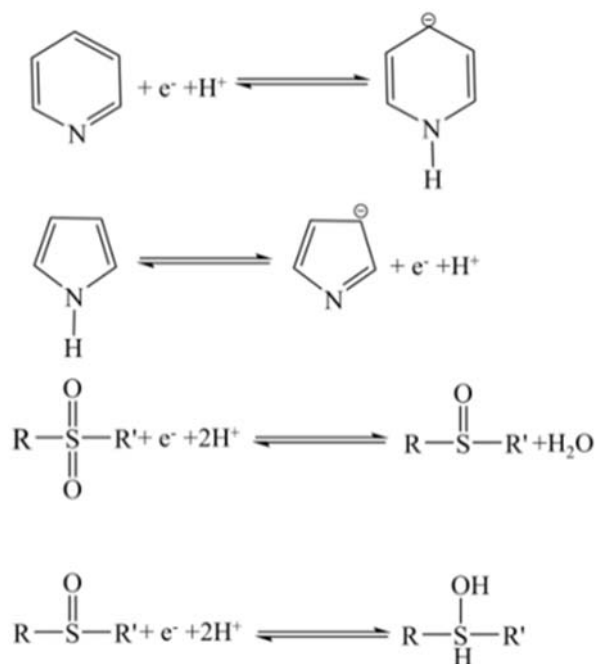**Fig. S1** Redox reaction of S, N compounds.

1. P. F. Tian, J. B. Zang, S. P. Jia, Y. Zhang, H. W. Gao, S. Y. Zhou, W. P. Wang, H. Q. Xu and Y. H. Wang, *Appl. Surf. Sci.*, 2018, **456**, 781-788.
2. H. Chen, F. Yu, G. Wang, L. Chen, B. Dai and S. L. Peng, *ACS Omega*, 2018, **3**, 4724-4732.
3. N. Q. Tran, B. K. Kang, M. H. Woo and D. H. Yoon, *ChemSusChem*, 2016, **9**, 2261-2268.
4. W. J. Tian, H. Y. Zhang, X. G. Duan, H. Q. Sun, M. O. Tade, H. M. Ang and S. B. Wang, *ACS Appl. Mater. Interfaces*, 2016, **8**, 7184-7193.
5. X. S. Zhang, P. T. Yan, R. J. Zhang, K. Liu, Y. Y. Liu, T. Liu and X. Y. Wang, *J. Mater. Chem. A*, 2016, **4**, 19053-19059.
6. T. Ouyang, K. Cheng, F. Yang, J. T. Jiang, J. Yan, K. Zhu, K. Ye, G. L. Wang, L. M. Zhou and D. X. Cao, *Chem. Eng. J.*, 2018, **335**, 638-646.
7. C. H. Yang, J. W. Xiong, X. Ou, C. F. Wu, X. H. Xiong, J. H. Wang, K. Huang and M. L. Liu, *Mater. Today Energy*, 2018, **8**, 37-44.
